# Supplementary material for: The Ca2+-dependent protein kinase CPK3 is required for MAPK-independent salt-stress acclimation in Arabidopsis
Source: PubMed Central journal article supplement (PMC2988408; doi:10.1111/j.1365-313x.2010.04257.x), 2010-06-15

(a)

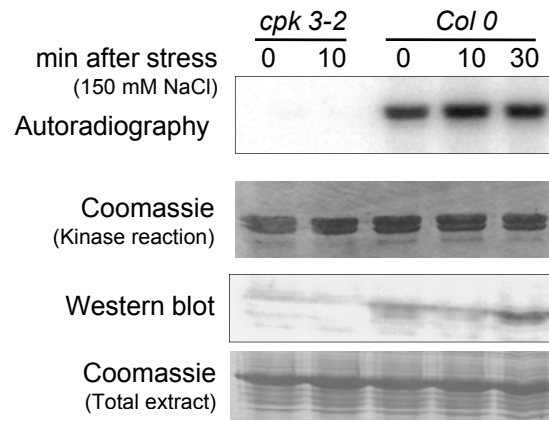

(b)

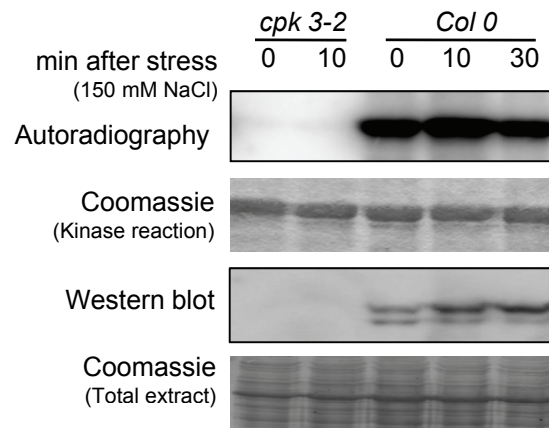

Supplement: tpj0063-0484-SD2.pdf [file tpj0063-0484-SD2.pdf]
